# Supplementary material for: Fragmented mitochondrial genomes are present in both major clades of the blood-sucking lice (suborder Anoplura): evidence from two Hoplopleura rodent lice (family Hoplopleuridae)
Source: PubMed Central journal article supplement (PMC4158074; doi:10.1186/1471-2164-15-751), 2014-09-02
Supplement: 12864_2014_6419_MOESM1_ESM.pdf [file 12864_2014_6419_MOESM1_ESM.pdf]

**Additional file 1 – PCR primers used to amplify and sequence the mitochondrial genomes of the rat lice, *Hoplopleura akanezumi* (Hoa) and *Hoplopleura kitti* (Hok).**

| Primer   | Target Gene    | Sequence (5' to 3')             | Species    |
|----------|----------------|---------------------------------|------------|
| 12SA     | <i>rmS</i>     | TACTATGTTACGACTTAT              | <i>Hoa</i> |
| 12SB     | <i>rmS</i>     | AAACTAGGATTAGATACCC             | <i>Hoa</i> |
| 16SF     | <i>rmL</i>     | TTAATTCAACATCGAGGTCGCAA         | <i>Hoa</i> |
| Lx16SR   | <i>rmL</i>     | GACTGTGCTAAGGTAGCATAAT          | <i>Hoa</i> |
| 12S 249F | <i>12S249</i>  | CTATCACCTTCCGACAGCGGTGTACAAGA   | <i>Hoa</i> |
| 12S249R  | <i>12S249</i>  | AAGGGGATAAGTCAAGTCAAGGTGCAGCC   | <i>Hoa</i> |
| 16S249F  | <i>16S249</i>  | CAAGATCTATAGGGTCTTCTCGTCCCTCTG  | <i>Hoa</i> |
| 16S249R  | <i>16S249</i>  | GGAAAGTAATTTTACCTGGGAAGGGGCTC   | <i>Hoa</i> |
| 249F     | <i>M249</i>    | GGCCTAGGATTAGGGTGGTAGTAATG      | <i>Hoa</i> |
| 249R     | <i>M249</i>    | CAACCGAGTTGGGGACAGAAACAAT       | <i>Hoa</i> |
| 12SA     | <i>rmS</i>     | TACTATGTTACGACTTAT              | <i>Hok</i> |
| 12SB     | <i>rmS</i>     | AAACTAGGATTAGATACCC             | <i>Hok</i> |
| 16SF     | <i>rmL</i>     | TTAATTCAACATCGAGGTCGCAA         | <i>Hok</i> |
| Lx16SR   | <i>rmL</i>     | GACTGTGCTAAGGTAGCATAAT          | <i>Hok</i> |
| Mtd6     | <i>cox1</i>    | GGAGGATTTGGAAATTGATTAGTTCC      | <i>Hok</i> |
| Mtd11    | <i>cox1</i>    | ACTGTAAATATATGATGAGCTCA         | <i>Hok</i> |
| 12S 344F | <i>12S344</i>  | CCGACAGCGGTGTACAAGATTTAAGCAAAGG | <i>Hok</i> |
| 12S 344R | <i>12S344</i>  | GGTGATATCCCCTTAACCTCACCGTATCCCA | <i>Hok</i> |
| 16S 344F | <i>16S344</i>  | GGTCTTCTCGTCCCTCTGAGACATTTAAGC  | <i>Hok</i> |
| 16S 344R | <i>16S344</i>  | GTAGGGATGAATTTTACCTGGGAAGGGG    | <i>Hok</i> |
| 344cox1F | <i>344cox1</i> | GAGAGCATGAGTTAAGATAGA ACTGACTCC | <i>Hok</i> |
| 344cox1R | <i>344cox1</i> | CACCAGCTATATGGAGCCTGAAAATTGCC   | <i>Hok</i> |
| 344F     | <i>M344</i>    | GTTGCACTCTATCTGCATAGGATAGGTGCG  | <i>Hok</i> |
| 344R     | <i>M344</i>    | CCACCCAAAAAGGGTGAGGGGTAGGGTA    | <i>Hok</i> |
