# Supplementary material for: Fragmented mitochondrial genomes are present in both major clades of the blood-sucking lice (suborder Anoplura): evidence from two Hoplopleura rodent lice (family Hoplopleuridae)
Source: PubMed Central journal article supplement (PMC4158074; doi:10.1186/1471-2164-15-751), 2014-09-02
Supplement: 12864_2014_6419_MOESM2_ESM.pdf [file 12864_2014_6419_MOESM2_ESM.pdf]

Additional file 2 – PCR primers used to verify the mitochondrial minichromosomes of the rat lice, *Hoplopleura akanezumi* (Hoa) and *Hoplopleura kitti* (Hok).

| Primer       | Target gene             | Sequence (5' to 3')                     |
|--------------|-------------------------|-----------------------------------------|
| 249M1F       | <i>trnN</i>             | GCATTGTTAGTGCAATCATAGGATTCTACC          |
| 249M1R       | <i>trnN</i>             | CCTCAGCCATTGGTTTTAACTAATGC              |
| 249M2F       | <i>trnS<sub>1</sub></i> | CTAAAGTGATTTGTGCCACTTATACCCC            |
| 249M2R       | <i>trnS<sub>1</sub></i> | TTAGAAGTCATGAATAGGTTTCTTACCCCG          |
| 249M3F       | <i>cox1</i>             | CAGAGGGAGCTTATTCTTGAACCCAC              |
| 249M3R       | <i>cox1</i>             | GGGAGAGCTCTAATCGAATTAATAATCC            |
| 249M4F       | <i>cox2</i>             | GTGTCTAGTGCAGACGTTCTCCACAGATGG          |
| 249M4R       | <i>cox2</i>             | GGAACCGAACTTCTGTAAGTAAGGGGATGC          |
| 249M5F       | <i>cox3</i>             | CTATTCCTGGGATTCCAGGTAGTTGAGTAC          |
| 249M5R       | <i>cox3</i>             | GCAGCCAAGAAGGCATGTGACAAGTAGC            |
| 249M6F       | <i>nad2</i>             | GTTATAGCCTTCGTGGAGCTGTTTCCTTC           |
| 249M6R       | <i>nad2</i>             | GCAAATTGCGAGAACTCTAAATGTTCTGTAG         |
| 249M7F       | <i>nad4</i>             | CTCTGAGGCGGCTTGGCTTGACTTTCTTTC          |
| 249M7R       | <i>nad4</i>             | CCTCCACTAGAGAGTGGTAAGAATTGATGG          |
| 249M8F       | <i>nad6</i>             | GGACTTTTGTAGTCCC TAGCTCTAACCTC          |
| 249M8R       | <i>nad6</i>             | GAGAGAATAACACCTTGGAAGGGCTACAC           |
| 249M9F       | <i>rrnS</i>             | AAGGGGATAAGTCAAGTCAAGGTGCAGCC           |
| 249M9R       | <i>rrnS</i>             | CTATCACCTTCCGACAGCGGTGTACAAGA           |
| 249M10F      | <i>rrnL</i>             | GGAAAGTAATTTTACCTGGGAAGGGGCTC           |
| 249M10R      | <i>rrnL</i>             | CAAGATCTATAGGGTCTTCTCGTCCCTCTG          |
| 249chimericF | <i>prnS</i>             | CGCCCCGTCACCTCCGTATAATAGCGGATAAG        |
| 249chimericR | <i>prnL</i>             | CAACACAAACGTTGAAACTGTTTACCCTC           |
| 344M1F       | <i>trnN</i>             | GGACAGACTCCTAACTACGTTTCTAGGAGG          |
| 344M1R       | <i>trnN</i>             | GACCACAGTAACAATGTGGAACCTCAAT            |
| 344M2F       | <i>trnE</i>             | GCCTGGAAGAATTGTTGTCTGTAAAG              |
| 344M2R       | <i>trnE</i>             | GGACCGTTTACCCAATGAAATTGGAATG            |
| 344M3F       | <i>trnI</i>             | GGCGGTACGGTAGGACATACCTCATAAGG           |
| 344M3R       | <i>trnI</i>             | CATCAAAGCGTCCGTAAACTCCGGCACC            |
| 344M4F       | <i>cox2</i>             | GAGGGTTGATAATGAAGTGTGCCTCCC             |
| 344M4R       | <i>cox2</i>             | GGGAGCTAGGACTAGTGTGTTGATGAGTC           |
| 344M5F       | <i>cox3</i>             | CGAGGGGAGTTTCTATTACATGATCCCATC          |
| 344M5R       | <i>cox3</i>             | CTCCGATTGGAGGTGTATACAACCGACCG           |
| 344M6F       | <i>nad1</i>             | GGCAACTCCAATTAATATTGCTACTATGGC          |
| 344M6R       | <i>nad1</i>             | CCCTCTTGAACGGAAACTAATAGGAACAG           |
| 344M7F       | <i>nad2</i>             | GTGTACTCTTCCATTTTAAGGAGAGGGTG           |
| 344M7R       | <i>nad2</i>             | GATATGACGGAGCCTAAAGGATACCAAGG           |
| 344M8F       | <i>trnK</i>             | GCTTCGAGATTTTAACTCGACTAAAACC            |
| 344M8R       | <i>trnK</i>             | CATAAGCTACCAAGAAATGTGTGAGTTC            |
| 344M9F       | <i>nad6</i>             | GAT AGG AGA TTA GCT TGT TCC AGT CAA CTC |
| 344M9R       | <i>nad6</i>             | GTA CAC TCA TTT CAA CTT TCG AGG GGC TAC |
| 344M10F      | <i>rrnS</i>             | GGTGATATCCCGTAACTCACCGTATCCCA           |

---

Continue-Additional file 2

|         |            |                                 |
|---------|------------|---------------------------------|
| 344M10R | <i>rms</i> | CCGACAGCGGTGTACAAGATTTAAGCAAAGG |
| 344M11F | <i>rml</i> | GTAGGGATGAATTTACCTGGGAAGGGG     |
| 344M11R | <i>rml</i> | GGTCTTCTCGTCCCCTGAGACATTTAAGC   |

Note: Primers with "249" are for *H. akanezumii*; those with "344" are for *H. kitti*
