# Supplementary material for: Fragmented mitochondrial genomes are present in both major clades of the blood-sucking lice (suborder Anoplura): evidence from two Hoplopleura rodent lice (family Hoplopleuridae)
Source: BMC Genomics. 2014 Sep 2;15(1):751. doi: 10.1186/1471-2164-15-751 (PMC4158074; doi:10.1186/1471-2164-15-751)
Supplement: Supplementary file 4 — Additional file 4: Alignment of nucleotide sequences of parts of the non-coding regions upstream (A) and downstream (B) of the coding regions of the 10 mitochondrial minichromosomes and a chimeric mitochondrial minichromosomes of Hoplopleura akanezumi. 249F and 249R are the PCR primers used to amplify the coding regions of all mitochondrial minichromosomes of Hoplopleura akanezumi. (PDF 58 KB) [file 12864_2014_6419_MOESM4_ESM.pdf]

Additional file 3 (A)

|                                           |                                                                                                  |     |
|-------------------------------------------|--------------------------------------------------------------------------------------------------|-----|
|                                           | (121 bp, 92% similarity)                                                                         |     |
| <i>Hsa up8-cap6-trnN</i>                  | GGCTAGGATTAGGTTGGTAGTAATGAAGAACTCTAAATAACCCACCGCTAAATCTAGGATTTGAAATTAAATAACGGGGCTATTCCGGGCT..... | 94  |
| <i>Hsa trnI-cos1</i>                      | GGCTAGGATTAGGTTGGTAGTAATGAAGAACTCTAAATAACCCACCGCTAAATCTAGGATTTGAAATTAAATAACGGG.....              | 80  |
| <i>Hsa trnI-cos4-trnF-trnL2</i>           | GGCTAGGATTAGGTTGGTAGTAATGAAGAACTCTAAATAACCCACCGCTAAATCTAGGATTTGAAATTAAATAACGGG.....              | 74  |
| <i>Hsa trnF-cab-trnS1-trnS2</i>           | GGCTAGGATTAGGTTGGTAGTAATGAAGAACTCTAAATAACCCACCGCTAAATCTAGGATTTGAAATTAAATAACGGG.....              | 93  |
| <i>Hsa ribonucleaseH2-prnL-prnS</i>       | GGCTAGGATTAGGTTGGTAGTAATGAAGAACTCTAAATAACCCACCGCTAAATCTAGGATTTGAAATTAAATAACGGG.....              | 102 |
| <i>Hsa trnL2-trnL-trnI</i>                | GGCTAGGATTAGGTTGGTAGTAATGAAGAACTCTAAATAACCCACCGCTAAATCTAGGATTTGAAATTAAATAACGGG.....              | 102 |
| <i>Hsa trnK-nad4</i>                      | GGCTAGGATTAGGTTGGTAGTAATGAAGAACTCTAAATAACCCACCGCTAAATCTAGGATTTGAAATTAAATAACGGG.....              | 91  |
| <i>Hsa trnK-nad4L-trnF-cos3-trnL-trnI</i> | GGCTAGGATTAGGTTGGTAGTAATGAAGAACTCTAAATAACCCACCGCTAAATCTAGGATTTGAAATTAAATAACGGG.....              | 85  |
| <i>Hsa trnL2-trnF-cos2</i>                | GGCTAGGATTAGGTTGGTAGTAATGAAGAACTCTAAATAACCCACCGCTAAATCTAGGATTTGAAATTAAATAACGGG.....              | 74  |
| <i>Hsa nad2</i>                           | GGCTAGGATTAGGTTGGTAGTAATGAAGAACTCTAAATAACCCACCGCTAAATCTAGGATTTGAAATTAAATAACGGG.....              | 121 |
| <i>Hsa trnS</i>                           | GGCTAGGATTAGGTTGGTAGTAATGAAGAACTCTAAATAACCCACCGCTAAATCTAGGATTTGAAATTAAATAACGGG.....              | 119 |
|                                           | → 249F                                                                                           |     |

Additional file 3 (B)

|                                           |                                                                                                                             |     |
|-------------------------------------------|-----------------------------------------------------------------------------------------------------------------------------|-----|
|                                           | (129 bp, 98% similarity)                                                                                                    |     |
| <i>Hsa trnL-cos1</i>                      | .....TGGTGGCTTTACCTTTATTCCTTATTTATTTCTGTGCCCCAGCTGGTTG.....                                                                 | 56  |
| <i>Hsa trnK-nad4L-trnF-cos3-trnL-trnI</i> | .....TTATTCCTTATTTATTTCTGTGCCCCAGCTGGTTG.....                                                                               | 40  |
| <i>Hsa trnK-nad4</i>                      | .....CTTTATTCCTTATTTATTTCTGTGCCCCAGCTGGTTG.....                                                                             | 43  |
| <i>Hsa trnL2-trnL-cos2</i>                | .....CTTTATTCCTTATTTATTTCTGTGCCCCAGCTGGTTG.....                                                                             | 43  |
| <i>Hsa trnS</i>                           | .....TTTATTCCTTATTTATTTCTGTGCCCCAGCTGGTTG.....                                                                              | 42  |
| <i>Hsa ribonucleaseH2-prnL-prnS</i>       | .....TTTATTCCTTATTTATTTCTGTGCCCCAGCTGGTTG.....                                                                              | 42  |
| <i>Hsa up8-cap6-trnN</i>                  | .....TTTATTCCTTATTTATTTCTGTGCCCCAGCTGGTTG.....                                                                              | 42  |
| <i>Hsa trnS-cab-trnS1-trnS2</i>           | .....ATTCTTATTTT-ATTGTTCTGTGCCCCAGCTGGTTG.....                                                                              | 37  |
| <i>Hsa trnL2-trnL-trnI</i>                | .....ATTATTCCTTATTT-ATTGTTCTGTGCCCCAGCTGGTTG.....                                                                           | 40  |
| <i>Hsa nad2</i>                           | .....ATTATTCCTTATTT-ATTGTTCTGTGCCCCAGCTGGTTG.....                                                                           | 40  |
| <i>Hsa trnC-nad6-trnW-trnL2</i>           | AACTTTGAGCAGTCTGAGCTGACGACCTATGTTGGGAGCATTGGTCATTAGTTTCTTATTAATATTTATTTATATTATAGTTTATCTTTATTT-ATTGTTCTGTGCCCCAGCTGGTTG..... | 125 |
|                                           | 249R←                                                                                                                       |     |
